# Supplementary material for: A zipped-up tunable metal coordinated cationic polymer for nanomedicine
Source: Royal Society of Chemistry journal article supplement (doi:10.1039/c9tb02965f), 2020-01-01
Supplement: c9tb02965f1.pdf [file c9tb02965f1.pdf]

## A Zipped-Up Tunable Metal Coordinated Cationic Polymer for Nanomedicine

Jianming Mao<sup>a</sup>, Jianwei Wang<sup>a, b</sup>, Guping Tang<sup>a, b</sup>, Paul K. Chu<sup>b</sup>, Hongzhen Bai<sup>\*, a, b</sup>

### Supplementary Figures and Discussions

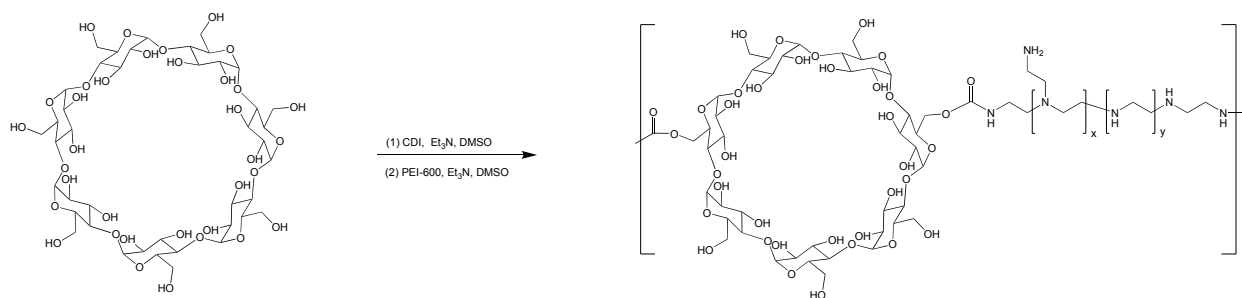

**Scheme S1.** Synthetic procedures of PC. In the process, two hydroxyl groups of each  $\beta$ -cyclodextrin were activated and then conjugated by PEI (MW = 600).

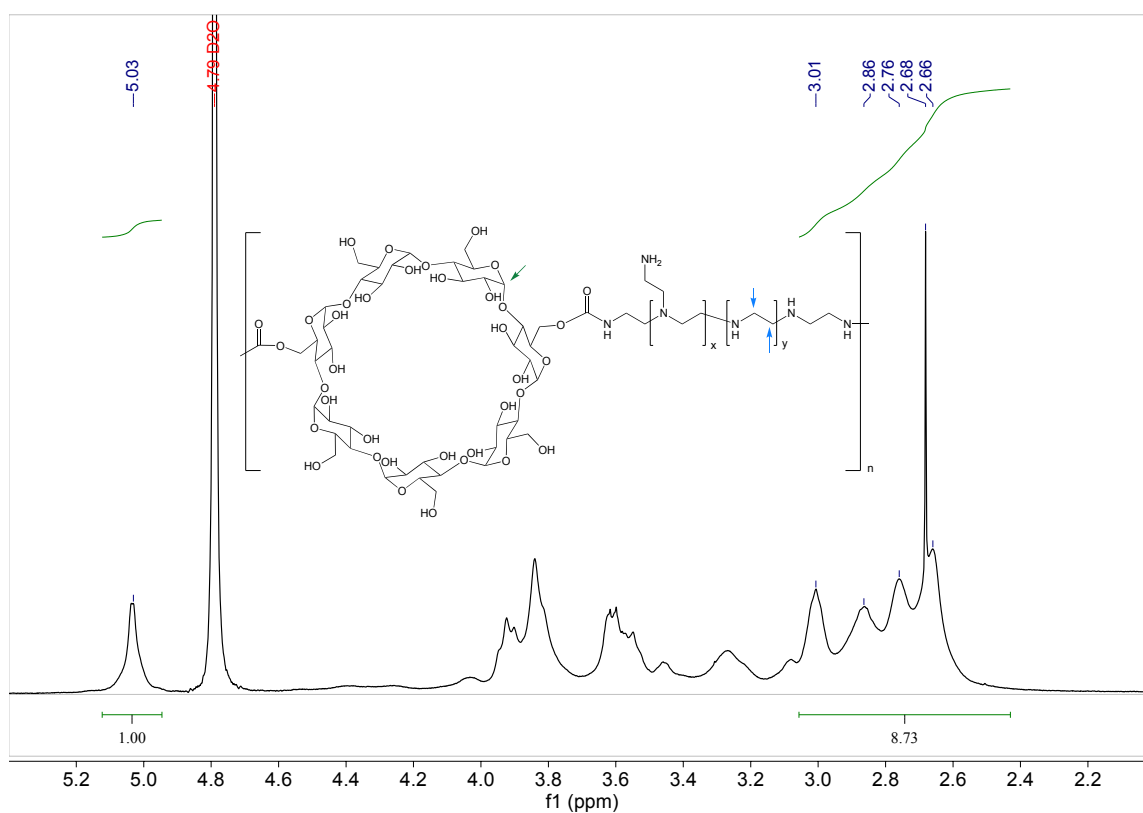

**Figure S1.**  $^1\text{H}$  NMR spectrum of PC.

| El. | Intensity (c/s) | Atomic % | Atomic Ratio | Conc    | Units | Error 2-sig | MDL 3-sig |
|-----|-----------------|----------|--------------|---------|-------|-------------|-----------|
| C   | 118.41          | 46.693   | 2.1004       | 31.976  | wt.%  | 1.783       | 1.845     |
| N   | 28.05           | 16.860   | .7584        | 13.465  | wt.%  | 1.776       | 2.088     |
| O   | 96.96           | 22.230   | 1.0000       | 20.279  | wt.%  | 1.114       | .959      |
| Cl  | 384.86          | 9.453    | .4252        | 19.108  | wt.%  | .464        | .245      |
| Fe  | 75.69           | 4.765    | .2143        | 15.171  | wt.%  | .859        | .552      |
|     |                 | 100.000  |              | 100.000 | wt.%  |             |           |

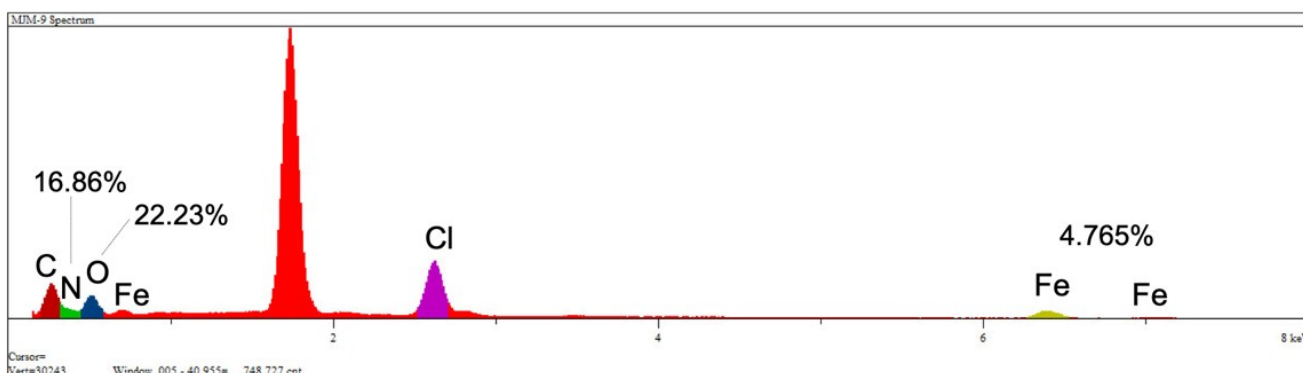

**Figure S2.** Elemental concentrations of M CCP with PC to Fe ratio of 1:1.

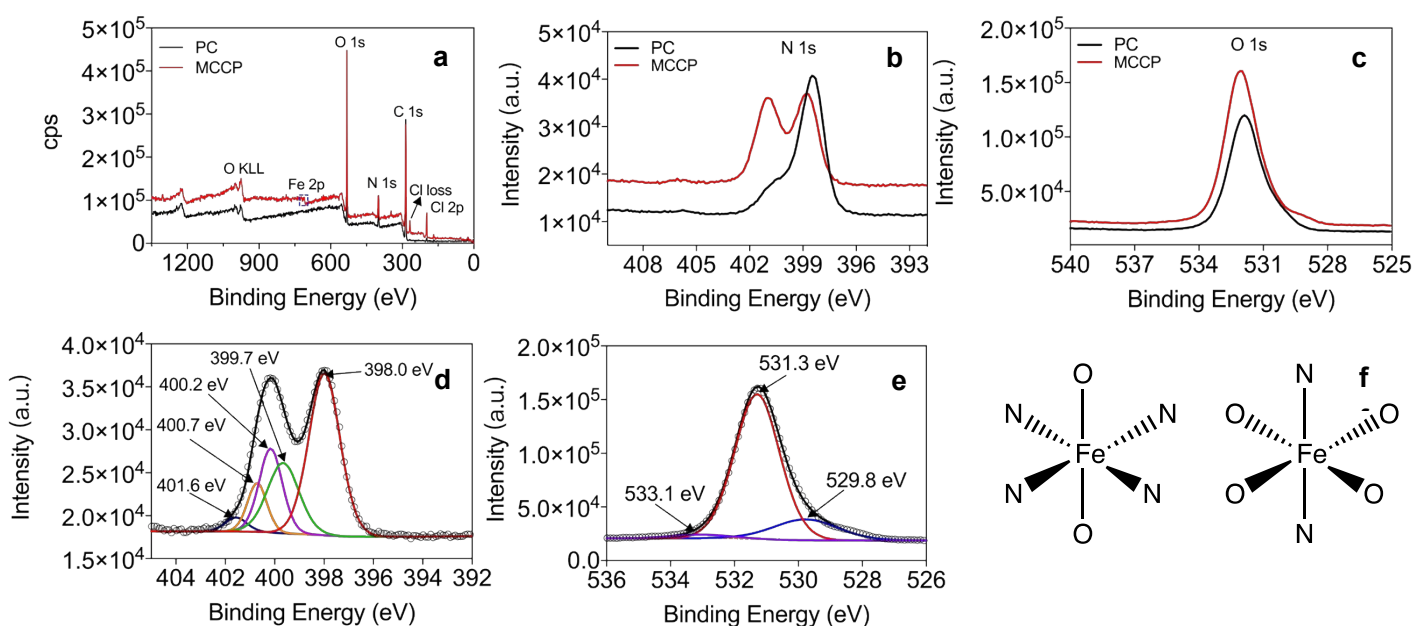

**Figure S3.** a) XPS survey spectrum of PC and M CCP. XPS b)  $N_{1s}$  and c)  $O_{1s}$  spectra and comparison of the chemical shifts of PC and M CCP indicating coordination of Fe-O and Fe-N. d) The  $N_{1s}$  XPS spectrum shows the peaks at binding energies of 398.0 eV, 399.7 eV, 400.2 eV, 400.7 eV, which are attributed to the C-N ( $1^\circ$ ), C-N-Fe, C-N ( $2^\circ$ ) and C-N ( $3^\circ$ ) bonds. e) The  $O_{1s}$  spectrum shows the peaks at binding energies of 529.8 eV, 531.3 eV and 533.1 eV, which are attributed to C-O-Fe, C-O and C-O(H)-Fe bonds. (f) Possible coordination between Fe and N, O.

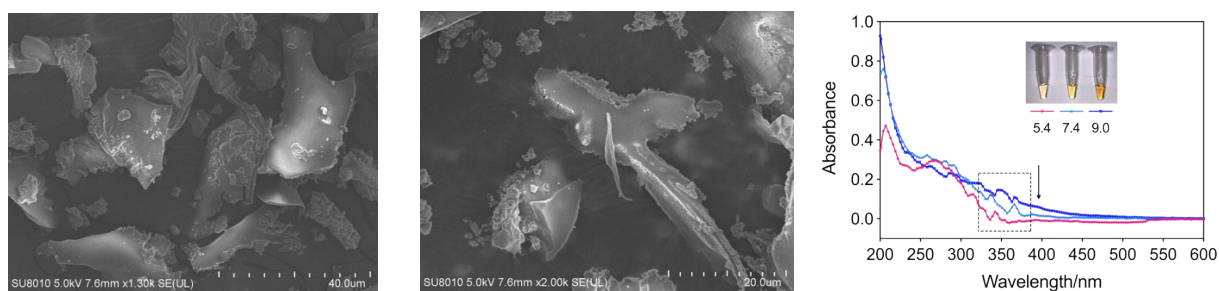

**Figure S4.** SEM images of MCCP prepared at pH = 5.4 (left and middle). UV-Vis spectra of MCCP prepared at different pH as indicated (right).

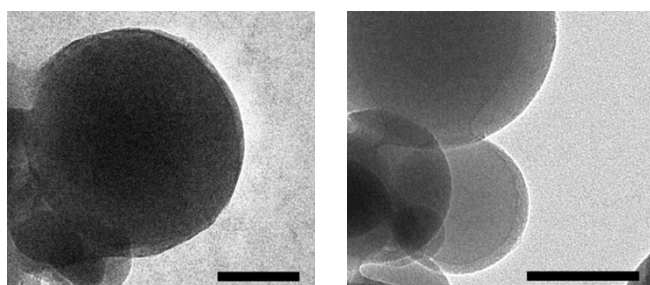

**Figure S5.** TEM images of SiO<sub>2</sub>@MCCP with PC:Fe ratios of 2:1 and 1:1 (scale bars = 100 nm).

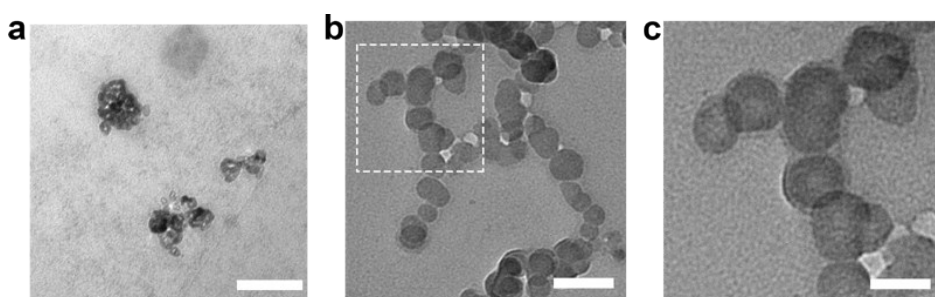

**Figure S6.** TEM images of (a) MCCP@TiO<sub>2</sub> (scale bar = 100nm), (b-c) MCCP@Sorafenib (scale bars = 100 nm and 50 nm)

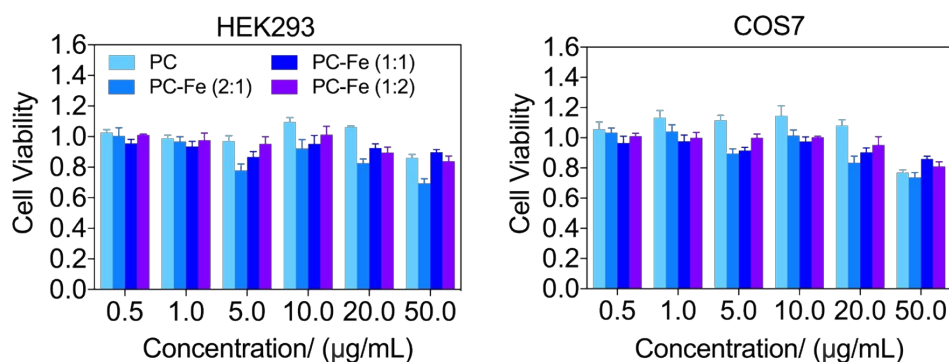

**Figure S7.** MTT assay of the HEK293 and COS7 cell lines treated with PC and MCCPs with different concentrations from 0.5 µg/mL to 50 µg/mL.

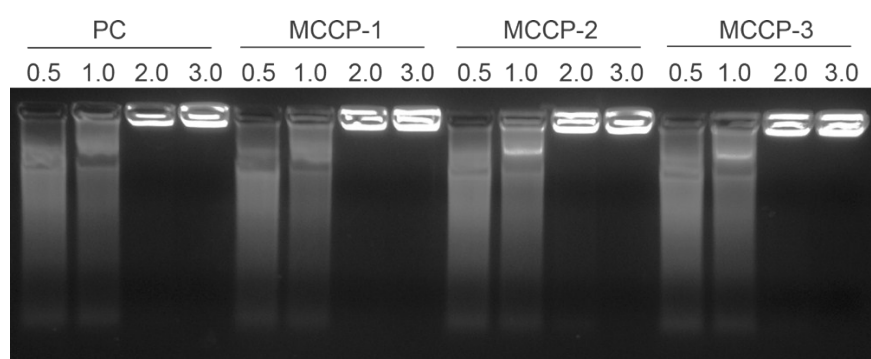

**Figure S8.** Gel retardation assays of MCCPs compared with PC.

**Table S1.** Size distributions and zeta potentials of DNA/MCCP and RNA/MCCP in comparison with those of DNA/PC and RNA/PC.

| Nucleic Acid | Material | Average Size (nm) | Average Zeta potential (mV) |
|--------------|----------|-------------------|-----------------------------|
| DNA          | PC       | 111.9 ± 48.68     | 30.0 ± 5.1                  |
|              | MCCP-1   | 160.9 ± 82.34     | 22.7 ± 7.9                  |
|              | MCCP-2   | 159.5 ± 66.84     | 17.1 ± 8.3                  |
|              | MCCP-3   | 184.8 ± 99.06     | 13.9 ± 4.8                  |
| RNA          | PC       | 154.8 ± 53.56     | 35.0 ± 6.9                  |
|              | MCCP-1   | 221.2 ± 153.3     | 29.7 ± 7.3                  |
|              | MCCP-2   | 28.99 ± 7.19      | 28.7 ± 7.09                 |
|              |          | 361.9 ± 158.9     |                             |
|              | MCCP-3   | 154.1 ± 80.43     | 16.0 ± 6.0                  |
|              |          | 629.4 ± 265.4     |                             |

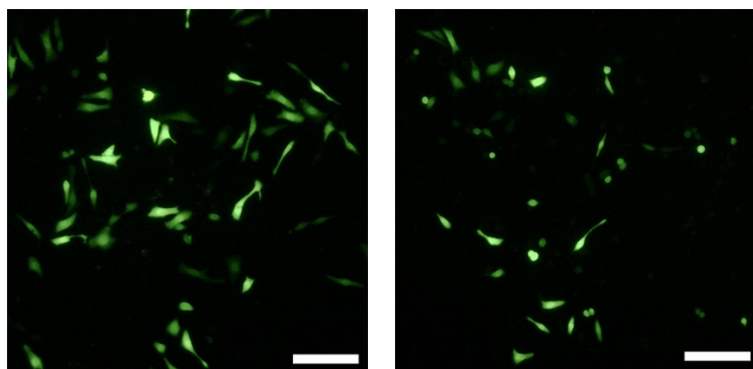

**Figure S9.** Fluorescence image of HEK 293 cell line treated with (left) pEGFP/PC and (right) pEGFP/MCCP-2 (scale bars = 100  $\mu$ m).

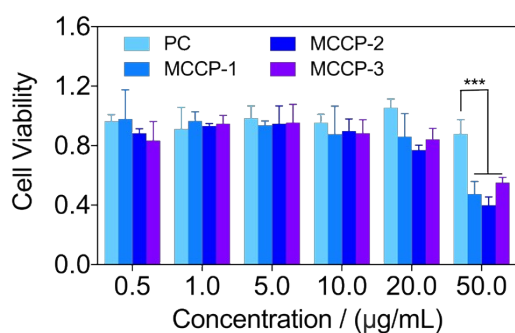

**Figure S10.** MTT assay of PC and MCCPs in KB cancer cells. When the concentration was increased to 50  $\mu$ g/mL, significant cell death was observed compared to cells treated with PC (data represent mean  $\pm$  SD,  $n = 3$ ; \*\*\*,  $P < 0.001$ ).

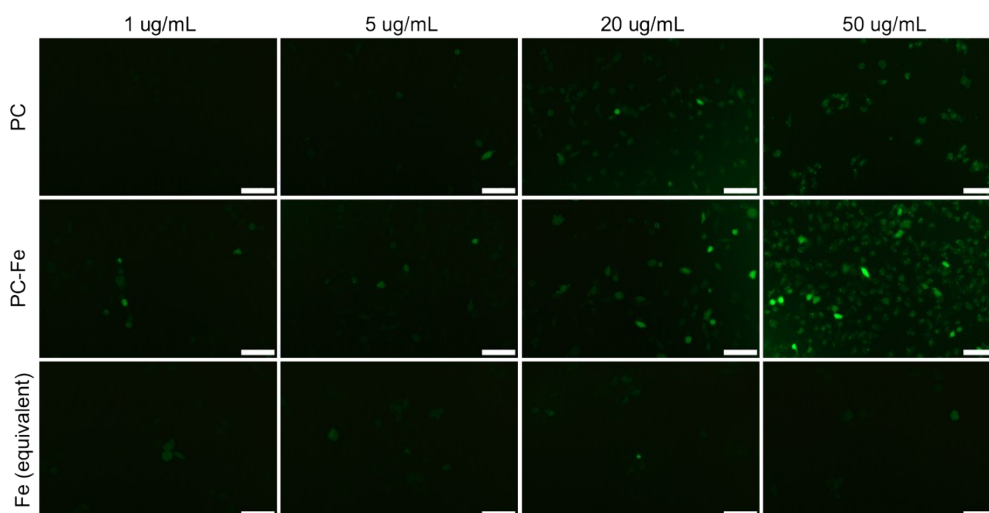

**Figure S11.** DCF fluorescence from KB cells treated with PC, MCCP-2 and equivalent  $\text{Fe}^{\text{III}}$  solutions (scale bar = 100  $\mu$ m)

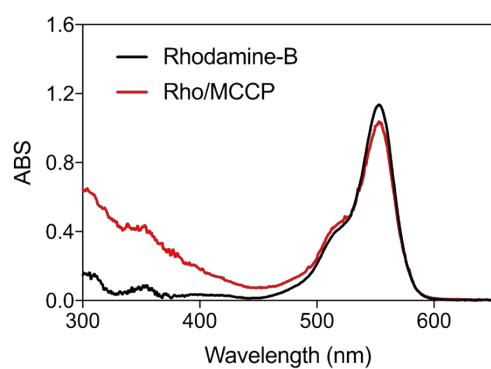

**Figure S12.** UV-Vis spectra of Rhodamine-B and Rho@MCCP.
